1 **Disease burden and clinical severity of the first pandemic wave of COVID-19 in**  
2 **Wuhan, China**

3  
4 Juan Yang, PhD <sup>1#</sup>, Xinhua Chen, BSc <sup>1#</sup>, Xiaowei Deng, MSc <sup>1</sup>, Zhiyuan Chen, BSc <sup>1</sup>,  
5 Hui Gong, BSc <sup>1</sup>, Han Yan, BSc <sup>1</sup>, Qianhui Wu, BSc <sup>1</sup>, Huilin Shi, BSc <sup>1</sup>, Shengjie  
6 Lai, PhD <sup>1,2</sup>, Marco Ajelli, PhD<sup>3</sup>, Cecile Viboud, PhD<sup>4</sup>, Prof Hongjie Yu, PhD<sup>1</sup>

7  
8 <sup>#</sup>These authors contributed equally to this work.

9 Corresponding author to Prof. Hongjie Yu, [yhj@fudan.edu.cn](mailto:yhj@fudan.edu.cn)

10

11 **Affiliations:**

12 1. School of Public Health, Fudan University, Key Laboratory of Public Health  
13 Safety, Ministry of Education, Shanghai, China

14 2. WorldPop, Department of Geography and Environment, University of  
15 Southampton, University Road, Southampton, SO17 1BJ, UK

16 3. Department of Epidemiology and Biostatistics, Indiana University School of Public  
17 Health, Bloomington, IN, USA

18 4. Division of International Epidemiology and Population Studies, Fogarty  
19 International Center, National Institutes of Health, Bethesda, MD, USA

20 **NOTE: This preprint reports new research that has not been certified by peer review and should not be used to guide clinical practice.**

- 21 This study does not necessarily represent the views of the US government or the  
22 National Institutes of Health.  
23  
24 Word count (abstract): 148  
25 Word count (main text):3,720  
26 Running head: Disease burden and clinical severity of COVID-19 in Wuhan

27 **Abstract**

28 The pandemic of novel coronavirus disease 2019 (COVID-19) began in Wuhan,  
29 China, where a first wave of intense community transmission was cut short by  
30 interventions. Using multiple data source, we estimated the disease burden and  
31 clinical severity of COVID-19 by age in Wuhan from December 1, 2019 to March 31,  
32 2020. We adjusted estimates for sensitivity of laboratory assays and accounted for  
33 prospective community screenings and healthcare seeking behaviors. Rates of  
34 symptomatic cases, medical consultations, hospitalizations and deaths were estimated  
35 at 796 (95%CI: 703-977), 489 (472-509), 370 (358-384), and 36.2 (35.0-37.3) per  
36 100,000 persons, respectively. The COVID-19 outbreak in Wuhan had higher burden  
37 than the 2009 influenza pandemic or seasonal influenza, and that clinical severity was  
38 similar to that of the 1918 influenza pandemic. Our comparison puts the COVID-19  
39 pandemic into context and could be helpful to guide intervention strategies and  
40 preparedness for the potential resurgence of COVID-19.

## 41 **Introduction**

42 As of 26 July 2020, 188 countries have been affected by the novel coronavirus disease  
43 2019 (COVID-19), with 15,745,102 COVID-19 cases and 644,661 deaths reported  
44 worldwide<sup>1</sup>. COVID-19 has a broad spectrum of severity. The bottom of the severity  
45 pyramid includes serological-confirmed infections, of which only a fraction will  
46 develop symptoms. A fraction of symptomatic cases may seek medical care, when  
47 they can be identified via surveillance systems, require hospitalization and die.  
48 Hospitalization is an important metric as it determines the strain exerted by an  
49 epidemic on the health care system. Further, deaths are highly relevant to planning  
50 pandemic response, as mortality is an outcome that health authorities typically aim to  
51 minimize. (Fig.1a)

52  
53 Estimates of disease burden and clinical severity of COVID-19 are critical to identify  
54 appropriate intervention strategies, plan for healthcare needs, and ensure the  
55 sustainability of the health system throughout the duration of the pandemic. However,  
56 quantifying these estimates based on surveillance data is challenging due to changes  
57 in health seeking behaviors during the pandemic, as well as underdiagnoses. For  
58 instance, the detection of a novel pathogen may give a high rate of false negatives.

59  
60 Historically, two influenza pandemics had far-reaching influence to humankind  
61 worldwide: the 1918 and 2009 influenza pandemics<sup>2</sup>. The 1918 influenza pandemic is

62 typically considered as the worst-case pandemic scenario for pandemic planning. In  
63 contrast, the 2009 influenza pandemic is considered mild but provides a benchmark  
64 for a pandemic in modern times, as the health systems, supportive care, and  
65 populations, are comparable with those of today. Comparing the COVID-19 burden  
66 and clinical severity with past influenza pandemics can help public health officials  
67 interpret the magnitude of the COVID-19 pandemic and the success of the response  
68 efforts. A further comparison between the COVID-19 pandemic and seasonal  
69 influenza can be useful to optimize health resource allocations, considering their  
70 overlapping circulation periods.

71

72 Wuhan is a particularly well-suited location to assess the health burden of COVID-19.  
73 Firstly, Wuhan experienced intense community transmission of severe acute  
74 respiratory syndrome coronavirus 2 (SARS-CoV-2); secondly, the first wave has  
75 ended, with only seven sporadic cases reported between March 24 and May 18<sup>3</sup>.  
76 Therefore, the first epidemic wave in Wuhan (for the period December 1, 2019-March  
77 31, 2020) is an opportunity to comprehensively quantify the disease burden and  
78 clinical severity of COVID-19. Here we used multiple data sources to estimate age-  
79 specific rates of symptomatic SARS-CoV-2 infections, medically attended cases,  
80 hospitalizations, and deaths, accounting for health seeking behaviors and  
81 underdiagnoses. We also estimated rates of medically attended influenza-like-illness  
82 (ILI) associated with SARS-CoV-2 infections; hospitalizations with severe acute

83 respiratory infection (SARI), and pneumonia hospitalizations associated with SARS-  
84 CoV-2 infections by dividing the number of ILI consultations, SARI hospitalizations  
85 and pneumonia hospitalizations by the number of symptomatic SARS-CoV-2  
86 infections. Moreover, we estimated the clinical severity of COVID-19 including the  
87 symptomatic case-fatality risk (sCFR), medically attended case-fatality risk (mCFR),  
88 hospitalization-fatality risk (HFR), symptomatic case-hospitalization risk (sCHR), and  
89 medically attended case-hospitalization risk (mCHR). The rates of symptomatic cases,  
90 medically attended cases, hospitalizations, and deaths with SARS-CoV-2 were  
91 calculated by dividing the number of cases at each level of severity by population  
92 size. Clinical severity was obtained by dividing the numbers of cases in the  
93 corresponding severity pyramid. (Fig.1a) Finally, we compared our estimates with  
94 those of the 1918 and 2009 influenza pandemics, and with seasonal influenza.

95

## 96 **Results**

### 97 **Reported COVID-19 cases**

98 We obtained the number of laboratory-confirmed COVID-19 cases and clinically-  
99 diagnosed cases in Wuhan from published literature and the Hubei Health  
100 Commission<sup>3,4</sup>. Cases were mainly confirmed by real-time reverse transcription  
101 polymerase chain reaction (RT-PCR) and included mild, moderate, severe, and critical  
102 cases<sup>5,6,7,8</sup>. Mild cases refer to cases with mild symptoms and no radiographic  
103 evidence of pneumonia. Moderate cases refer to cases with fever, respiratory

104 symptoms, and radiographic evidence of pneumonia. Severe cases refer to cases with  
105 any breathing problems, finger oxygen saturation, and low PaO<sub>2</sub>/FiO<sub>2</sub> (PaO<sub>2</sub> denotes  
106 partial pressure of oxygen in arterial blood; FiO<sub>2</sub> denotes fraction of inspired oxygen),  
107 etc. Critical cases refer to cases having any respiratory failure, shock, and any other  
108 organ failure that requires ICU admission. Clinically-diagnosed cases included  
109 suspected cases with pneumonia as indicated by chest radiography, but without  
110 virological confirmation of infection<sup>6</sup>. (Supplementary Information File 1) These  
111 clinically-diagnosed cases were included in our study, recognizing the value of a  
112 clinical definition at the peak of a pandemic and in the context of limited laboratory  
113 testing capacity. A total of 50,333 COVID-19 cases were reported in the four-month  
114 epidemic in Wuhan. Of them, 32,968 (65.5 %) were laboratory-confirmed cases. As  
115 of July 20, 3,869 cases have died, and all others recovered. These cases were recorded  
116 from passive surveillance which was launched at the start of the outbreak in late  
117 December 2019 in Wuhan<sup>9</sup>, and from active door-to-door and individual-to-individual  
118 screenings for fever (Supplementary Information File 2)<sup>10, 11</sup>.

119

## 120 **Estimated disease burden of COVID-19**

121 RT-PCR sensitivity for SARS-CoV-2 detection varies based on the interval between  
122 symptom onset and laboratory testing, which was highest (97.9%) at an interval of <7  
123 days<sup>12</sup>. A population-based telephone and online survey conducted in Wuhan found  
124 that 35.4% (95%CI 28.4%-43.9%) of patients with acute respiratory infections (i.e.,

125 fever with any symptoms of cough, and/or sore throat) sought medical care during the  
126 epidemic of COVID-19<sup>13</sup>. All cases from passive surveillance were considered as  
127 medically attended cases. In the baseline analysis, we assumed that a proportion of  
128 mild cases, and all moderate-to-critical cases (had radiographic evidence of  
129 pneumonia) captured by active screening in the community would eventually seek  
130 medical care given that the health system was not overwhelmed. It was assumed that  
131 the cases from passive surveillance had the same health seeking behavior as those  
132 captured by active screening in the community. Laboratory-confirmed cases  
133 (moderate-to-critical) and clinically-diagnosed cases had radiographic evidence of  
134 pneumonia, and thus were considered as requiring hospitalization. (Fig.1b)

135  
136 After adjusting for sensitivity of RT-PCR testing, and accounting for the probability  
137 of seeking medical care and prospective screening in the community, we estimated  
138 that a total of 52,300 (95%CI 50,500-54,500) medically-attended cases and 39,600  
139 (95%CI 38,300-41,100) hospitalizations were associated with COVID-19. In Wuhan,  
140 over the period from December 2019 to March 2020, the rates of symptomatic cases,  
141 medical consultations, hospitalizations and deaths for COVID-19 were 796 (95%CI  
142 703-977), 489 (95%CI 472-509), 370 (95%CI 358-384) and 36.2 (95%CI 35.0-37.3)  
143 per 100,000 individuals respectively. A consistent increasing trend with age was  
144 observed across all metrics, with the highest rates occurring in adults aged 60 years  
145 and over (Fig.2a, Fig.3a, Fig.4a and Supplementary Information File 3).



146

147 The rate of medical consultation for COVID-19 (mean: 489 per 100,000 individuals)  
148 was lower than that of the 2009 influenza pandemic in China and the US (680 and  
149 1,030 per 100,000 individuals, respectively). The rate of medical consultation was  
150 intermediate between that of the 2012-2013 influenza season in the US (1,070 per  
151 100,000 persons) and the 2006-2015 influenza seasons in China (mean: 250 per  
152 100,000 individuals per year)<sup>14, 15</sup>. (Fig.2a-2e and Supplementary Information File 3-  
153 4)

154

155 The hospitalization rates of COVID-19 in Wuhan were 3.1-fold higher than that of the  
156 2009 influenza pandemic, and 1.8-2.6 times that of seasonal influenza<sup>16, 17, 18, 19</sup>.

157 Higher hospitalization burden was found among older adults for COVID-19, while the  
158 hospital burden was shifted towards children for seasonal influenza in China<sup>20</sup> and the  
159 2009 influenza pandemic in the US<sup>16</sup>. (Fig.3 and Supplementary Information File 3-4)

160 The overall mortality rate of COVID-19 in Wuhan was much higher than that of 2009  
161 influenza pandemic and seasonal influenza (36.2 vs. 3.6-6.5 per 100,000 individuals)  
162 <sup>20, 21, 22</sup>. (Fig.4 and Supplementary Information File 3-4)

163

#### 164 **Estimated clinical severity of COVID-19**

165 The overall sCFR of COVID-19 was 4.54% (95%CI 3.70-5.14%), which is  
166 comparable, if not higher, than that of the 1918 influenza pandemic – from the

167 analysis of data from eight US localities, the sCFR was estimated at 1.61% and 1.98%  
168 for the first and second wave, respectively<sup>23, 24</sup>. Such a figure is substantially higher  
169 than that of the 2009 influenza pandemic (<0.1% in the US)<sup>25</sup>. The sCFR of COVID-  
170 19 was higher for adults aged  $\geq 60$  years than for the other age groups (9.09% vs.  
171 0.36%-1.97%). (Fig.5a-5c and Supplementary Information File 5) In contrast,  
172 younger age groups were the most affected segment of the population during the 1918  
173 and 2009 influenza pandemic, while both young and old individuals were the most  
174 affected during seasonal influenza epidemics<sup>14, 15, 16, 17, 18, 19, 20, 21, 22, 23, 24, 25, 26</sup>.

175

176 The HFR (9.77%, 95% CI 9.41%-10.10%) and sCHR (46.48%, 95% CI: 39.33%-  
177 50.93%) were higher for COVID-19 than for the 2009 influenza pandemic (HFR:  
178 2.6% in North America<sup>26</sup>; sCHR: 1.44% in the US<sup>25</sup>)(Fig.5e-5h and Supplementary  
179 Information File 5).

180

### 181 **Sensitivity analyses**

182 To assess the robustness of our findings, we conducted four sensitivity analyses: In  
183 scenario i) we assumed that moderate cases had the same health seeking behavior as  
184 mild cases, i.e., only a proportion of moderate cases sought medical assistance; in  
185 scenario ii) we excluded clinically-diagnosed cases; in scenario iii) we used the upper  
186 limit of 95%CI of the probability of seeking medical care; and in scenario iv) we used  
187 the lower limit of 95%CI of the probability of seeking medical care. Compared to the

188 baseline analysis, the mean rates of symptomatic cases for COVID-19 increased from  
189 796 to 935 per 100,000 persons in scenario i) and 960 per 100,000 persons in scenario  
190 iv), while rates decreased to 634 per 100,000 persons in scenario ii) and 719 per  
191 100,000 persons in scenario iii). The sCFR decreased from 4.54% to 3.87% in  
192 scenario i) and 3.77% in scenario iv), while it increased to 5.38% in scenario ii) and  
193 5.03% in scenario iii). Similar patterns were observed for the other metrics of interests  
194 (Supplementary Information File 3). Overall, the estimated variations did not change  
195 our findings, particularly for comparison of COVID-19 with pandemic and seasonal  
196 influenza.

197

### 198 **ILI consultations and SARI/pneumonia hospitalizations**

199 We quantitatively assessed the impact of COVID-19 on the healthcare sector using  
200 the local number of ILI consultations and SARI/pneumonia hospitalizations in the  
201 absence of COVID-19 as a reference. The rate of medically attended COVID-19 was  
202 approximately 1.3 times the baseline ILI consultations among adults of  $\geq 60$  years of  
203 age. The hospitalization rate of COVID-19 was 3-6 fold higher than baseline SARI  
204 hospitalizations among adults of  $\geq 20$  years of age, and 25-132 fold higher than  
205 pneumonia hospitalizations as a reference (and Supplementary Information File 6).

206

### 207 **Discussion**

208 This study uses multiple sources of data to estimate different levels of the COVID-19  
209 severity pyramid. We find that the mean rates of symptomatic cases, medical  
210 consultations, hospitalizations and deaths were respectively 796, 489, 370, and 36.2  
211 per 100,000 persons in Wuhan from December 2019 to March 2020. All burden  
212 metrics increased with age, with adults  $\geq 60$  years of age most affected. Similarly, the  
213 highest sCFR and HFR were found in older adults.

214

215 Our study is strengthened by adjustment for several potential biases. First, rates of  
216 medical consultations were adjusted by the sensitivity of RT-PCR assays<sup>12</sup>.  
217 Sensitivity was only 30-40% before January 23 due to delayed detection, which could  
218 lead to important underdiagnoses and has not been considered in previous studies.  
219 Second, we accounted for the health seeking behaviors among the Wuhan population  
220 during the epidemic<sup>13</sup>. The probability of seeking medical treatment conditionally on  
221 symptoms of acute respiratory diseases is a critical parameter to estimate the true  
222 number of COVID-19 cases in community. Accordingly, our estimates of disease  
223 burden may be the most accurate for Wuhan so far.

224

225 Two studies reported on COVID-19 disease burden in the US and Canada by the end  
226 of May, at which time local epidemics are still ongoing (Supplementary Information  
227 File 7)<sup>27, 28</sup>. The overall rate of symptomatic cases (796 vs. 404-534 per 100,000  
228 persons) in Wuhan was much higher than that in the US and Québec, a severely

229 affected province of Canada. Variation in testing strategies likely contribute to the  
230 difference in rate of symptomatic cases, in addition to true difference in epidemic  
231 dynamics. Unlike in Wuhan, only individuals with signs or symptoms consistent with  
232 COVID-19, and asymptomatic individuals with suspected exposure were  
233 preferentially tested in the US. Moreover, in contrast to our study, the US and  
234 Canadian estimates were not adjusted for the sensitivity of RT-PCR assays and health  
235 seeking behavior, and thus may be underestimated.

236

237 Our estimated hospitalization rate for a four-month COVID-19 outbreak was much  
238 higher than that for a three-to-six-month COVID-19 outbreak in the US and Québec  
239 (370 vs. 47-114 per 100,000 persons)<sup>27, 28, 29, 30</sup>. We estimated that 76% of medically-  
240 attended cases were hospitalized in Wuhan, while only 18% were hospitalized in the  
241 US<sup>30</sup>. The difference between these estimates could be explained by the potential  
242 different clinical thresholds for hospitalization. We assumed that moderately ill cases  
243 with radiographic evidence of pneumonia and more severe cases would be  
244 hospitalized in the context of medical practices in China, based on the probability of  
245 progression from disease to death<sup>31</sup>. However, such results may not apply to other  
246 countries with different healthcare practice and general health seeking behaviors. For  
247 example, Chinese patients are less likely to seek care at primary health institutions  
248 than hospitals<sup>32</sup>.

249

250 The mortality rate of COVID-19 in Wuhan was lower than the excess mortality in  
251 New York City (24,172 excess deaths<sup>33</sup> among 19,746,286 individuals, and thus 122  
252 per 100,000 individuals), and Québec (52 per 100,000 persons)<sup>28</sup>, but similar to the  
253 national excess all-cause mortality in the US (122,300 excess deaths among  
254 332,382,720 individuals, and thus 36.8 per 100,000 individuals)<sup>34</sup>. In our study,  
255 patients who died at home or died before being diagnosed were not considered, which  
256 could have been important in the early phase of the epidemic due to under-  
257 ascertainment. A recent comprehensive correction of official tallies of cases and  
258 deaths by the Wuhan Authorities, included in this study, could minimize this under-  
259 ascertainment. Further research should use excess mortality approaches<sup>33</sup> to capture  
260 the full burden of the outbreak, when vital registration data for this period become  
261 available.

262

263 Our estimates of sCFR (4.54% vs. 1.2-1.4%) and mCFR (7.40% vs 5.91%) for Wuhan  
264 are higher than in prior modeling studies<sup>35, 36</sup>. This is likely explained by the addition  
265 of revised statistics on cases and deaths, and a more complete dataset with no right-  
266 censored outcomes in our study. Large variations in mCFR were observed between  
267 countries, which have not been systematically analyzed. Qualitatively, these  
268 variations could be explained by differences in the sensitivity of surveillance systems

269 to detect cases at different levels of the severity pyramid, differences in clinical care  
270 of severe and critical patients, and in age structure and underlying conditions of the  
271 population.

272

273 Our HFR estimate (9.77%) is higher than the estimate obtained by Wang et al. in a  
274 highly censored sample in Wuhan in the very early stages of the epidemic (4.3%)<sup>37</sup>.

275 However, it is much lower than the 28% estimate obtained in two COVID-19-  
276 designated hospitals for severe COVID-19 cases in Wuhan, probably due to the  
277 particularly high proportion of severe and critical patients hospitalized in these  
278 facilities (64% vs. 28%)<sup>38</sup>. Our HFR estimate was lower than the 18.1% estimate in  
279 France<sup>39</sup>, probably due to aforementioned loose threshold for hospital admissions in  
280 China and preference of seeking care in hospitals rather than outpatient settings.

281

282 We systematically compared the burden of the COVID-19 outbreak with that of the  
283 1918 and 2009 influenza pandemics and seasonal influenza. Our COVID-19 estimates  
284 are substantially higher than those of the 2009 influenza pandemic and seasonal  
285 influenza, and similar to the 1918 influenza pandemic. However, the age pattern of  
286 severe disease was clearly different. Our COVID-19 severity estimates increased with  
287 age. In contrast, younger age groups were the most affected by 1918 and 2009  
288 influenza pandemic, and both youngest and oldest individuals were the most affected  
289 by seasonal influenza. Small changes were observed when we adjusted the overall

290 burden and clinical severity of seasonal and pandemic influenza using Wuhan age  
291 profile as a reference (Supplementary Information File 5 and File 8). Comparison of  
292 severity estimates between pandemics was difficult to standardize, particularly for  
293 1918 influenza pandemic<sup>23</sup>. The 1918 sCFR is based on data from a single US study  
294 from more than a 100 years ago, at a time when awareness of viral diseases was  
295 inexistent, case ascertainment and disease surveillance were limited, and definition of  
296 clinical outcomes varied. Therefore, our comparison was not intended to quantify the  
297 absolute value of differences, but to put the COVID-19 pandemic into perspective.

298

299 To put our results in perspective, it is important to stress that our COVID-19 estimates  
300 refer to the first epidemic wave in Wuhan - a four-month long period. The epidemic  
301 was controlled by intense interventions<sup>4</sup>. If the epidemic rebounds, as one would  
302 expect if the infection was reintroduced in a population with low immunity, the  
303 disease burden would rise. Moreover, given that the epidemic lasted only four months,  
304 the stress on the healthcare system was tremendous, as severe cases and  
305 hospitalizations were concentrated over a relatively short period of time. Furthermore,  
306 neither seasonal nor pandemic influenza outbreaks were controlled, as vaccination  
307 was either low or delayed until after the main wave had passed, and no social  
308 distancing was put in place.

309



310 Using a simple data-driven approach, we quantitatively assessed the impact of  
311 COVID-19 on the healthcare sector using the local number of ILI consultations and  
312 SARI/pneumonia hospitalizations in the absence of COVID-19 as a reference. The  
313 number of COVID-19 hospitalizations was several folds higher than that of baseline  
314 SARI hospitalizations and 25-132 folds higher than that of pneumonia  
315 hospitalizations among adults  $\geq 20$  years of age. This indicates that during this time  
316 period, the Wuhan healthcare system considerably exceeded surge capacity,  
317 highlighting the importance and necessity of preparedness for sufficient healthcare  
318 resources. Moreover, there is a winter peak of consultations and hospitalizations  
319 related to respiratory diseases such as seasonal influenza and respiratory syncytial  
320 virus<sup>14, 40, 41</sup>, which may have contributed to overwhelm the healthcare sector during  
321 the first wave of the COVID-19 epidemic.

322

323 Our study has some limitations. Firstly, health seeking behavior maybe not constant  
324 throughout the epidemic. In this survey, study participants in Wuhan were asked to  
325 review their history of ARI between December 2019 and March 2020, and whether  
326 they sought medical assistance for these symptoms<sup>13</sup>. However, since we did not  
327 obtain the onset date of these symptoms, and hence we could not stratify health-  
328 seeking behavior by COVID-19 epidemic phase. Instead, we calculated the overall  
329 proportion of ARIs cases who sought medical care during the epidemic. If the  
330 distribution of onset dates of ARIs cases in our sample was skewed towards the early

331 phase (late January) of the epidemic, the proportion seeking medical care may be  
332 underestimated due to the overwhelmed health system. That would lead to an  
333 overestimation of the number of symptomatic COVID-19 cases. Conversely, if the  
334 distribution of onset dates was skewed towards the late phases of epidemic, we may  
335 have underestimated the number of symptomatic COVID-19 cases. We conducted a  
336 sensitivity analysis on the probability of seeking medical care, using the lower and  
337 upper limits of the 95%CI of our survey. This analysis resulted in minor changes in  
338 the disease burden and clinical severity estimates compared to the baseline analysis.

339

340 Secondly, missing or incorrect records of COVID-19 cases are inevitable during an  
341 outbreak, particularly in the period when the healthcare capacity is overwhelmed. A  
342 verification of reported COVID-19 cases was conducted by Wuhan Authorities to  
343 correct for late reporting, omissions and mis-reporting, with 325 laboratory-confirmed  
344 cases and 1,290 deaths added to official tallies. Due to the high specificity of RT-PCR  
345 assay (almost 100%), false positives were rare<sup>42, 43, 44, 45</sup>. We included in the analysis  
346 clinically-diagnosed cases that were reported for a brief one-week period, when  
347 testing could not keep up, so we inevitably overestimated the true number of COVID-  
348 19 cases. Our sensitivity analyses showed that the exclusion of these clinically-  
349 diagnosed cases led to decreased estimates of disease burden and increased estimates  
350 of clinical severity. However, our conclusions are robust to these changes. Moreover,  
351 while reporting of cases changed at the beginning of the pandemic as the definition of

352 COVID-19 suspected cases broadened to include a milder spectrum, we expect  
353 reporting was relatively stable throughout the rest of the outbreak although this would  
354 be difficult to prove conclusively.

355

356 Additionally, it is difficult to extrapolate our findings to other countries/regions since  
357 estimates of clinical severity and disease burden of COVID-19 are influenced by  
358 multiple factors such as the evolution of the epidemic, intervention policies, case  
359 detection strategy, surge capacity of healthcare systems, differences in presentation,  
360 triage, and treatment, and health seeking behavior over time and across locations. A  
361 modelling study has revealed that containment has proved to be successful to control  
362 the local COVID-19 epidemic in Wuhan. Without containment efforts, the number of  
363 COVID-19 cases would have been an estimated 67-fold higher than that has been thus  
364 far<sup>46</sup>. Therefore, our estimates in Wuhan could represent the disease burden and  
365 clinical severity in a region with 1) wide-spread community transmission of SARS-  
366 CoV-2; 2) strict non-pharmaceutical interventions, referred as to “wartime measures”  
367 in the study by Leung et al.<sup>47</sup>; 3) extensive detection of all outpatients with fever<sup>10</sup>; 4)  
368 enhanced healthcare capacity. Indeed, Wuhan experienced remarkably rapid and  
369 extensive support from top-level medical staff drawn from all over China, as well as  
370 rapid establishment of medical facilities like the Leishenshan and Fangcang shelter  
371 hospitals<sup>48, 49, 50</sup>. Although the COVID-19 pandemic has already spread across the  
372 world, and the scale of epidemics in western countries, like the US and Brazil,

373 exceeded that in Wuhan by far, the pandemic in other countries is still ongoing and  
374 any estimate is bound to be revised. Our estimates represent the full impact of a short  
375 but intense first wave, and could be considered as benchmarks to plan intervention  
376 strategies for a potential second wave of the pandemic.

377

378 In the first wave of the COVID-19 pandemic from December 2019 through March  
379 2020 in Wuhan, China, intense community transmission caused higher disease burden  
380 than the 2009 influenza pandemic and seasonal influenza. Overall, we find that the  
381 clinical severity of COVID-19 seems to be in the same order of magnitude as that of  
382 the 1918 influenza pandemic. In contrast to the age pattern of influenza virus  
383 infection, however, the highest burden and clinical severity of COVID-19 is observed  
384 among older adults, while children are less affected. During the epidemic of COVID-  
385 19, the Wuhan healthcare system considerably exceeded surge capacity. This study is  
386 helpful to guide intervention strategies and healthcare preparedness for the potential  
387 re-emergence of COVID-19 in China and beyond.

388 **Figure legend**

389 **Figure 1. Severity levels of COVID-19 and schematic diagram of the baseline**  
390 **analyses.**

391 A: Severity levels of infections with SARS-CoV-2 and parameters of interest. Each  
392 level is assumed to be a subset of the level below. sCFR: symptomatic case-fatality  
393 risk; sCHR: symptomatic case-hospitalization risk; mCFR: medically attended case-  
394 fatality risk; mCHR: medically attended case-hospitalization risk; and HFR:  
395 hospitalization-fatality risk.

396 B: Schematic diagram of the baseline analyses. Data source of COVID-19 cases in  
397 Wuhan: *D1*) 32,583 laboratory-confirmed COVID-19 cases as of March 8<sup>4</sup>, *D2*)  
398 17,365 clinically-diagnosed COVID-19 cases during February 9-19<sup>4</sup>, *D3*)daily  
399 number of laboratory-confirmed cases on March 9-April 24<sup>3</sup>, *D4*) total number of  
400 COVID-19 deaths as of April 24 obtained from the Hubei Health Commission<sup>3</sup>, *D5*)  
401 325 laboratory-confirmed cases and *D6*) 1,290 deaths were added as of April 16  
402 through a comprehensive and systematic verification by Wuhan Authorities<sup>3</sup>, and *D7*)  
403 16,781 laboratory-confirmed cases identified through universal screening<sup>10, 11</sup>.  $P_{se}$ :  
404 RT-PCR sensitivity<sup>12</sup>.  $P_{med.care}$ : proportion of seeking medical assistance among  
405 patients suffering from acute respiratory infections<sup>13</sup>. (Red, blue and green arrows  
406 separately denote the data flow from laboratory-confirmed cases of passive

407 surveillance, clinically-diagnosed cases, and laboratory-confirmed cases of active  
408 screenings)

409

410 **Figure 2.** Rates of symptomatic cases and of medical consultation rates by age group  
411 (mean, 95%CI)

412 a: rates of medical consultation associated with COVID-19 in Wuhan, China

413 b: rates of medical consultation associated with 2009 pandemic H1N1 influenza,

414 China<sup>14</sup>

415 c: rates of medical consultation associated with 2009 pandemic H1N1 influenza,

416 USA<sup>15</sup>

417 d: seasonal influenza-associated excess ILI outpatient consultations rates, China<sup>14</sup>

418 e: rates of medical consultation associated with seasonal influenza, USA<sup>15</sup>

419 **Figure 3.** Hospitalization rates

420 a: rates of hospitalization associated with COVID-19 in Wuhan, China (mean,

421 95%CI)

422 b: rates of hospitalization associated with 2009 pandemic H1N1 influenza, USA

423 (median, range)<sup>16</sup>

424 c: rates of hospitalization associated with seasonal influenza related SARI in

425 Jingzhou, Hubei province, China (median, range)<sup>17</sup>

426 d: rates of hospitalization associated with seasonal influenza, USA (mean, 95%CI)<sup>18</sup>.

427 <sup>19</sup>

428 **Figure 4. Mortality rates**

429 a: rates of mortality associated with COVID-19 in Wuhan, China (mean, 95%CI)

430 b: rates of mortality associated with 2009 pandemic H1N1 influenza, USA (75%

431 percentile)<sup>20</sup>

432 c: excess mortality rates associated with seasonal influenza, China (mean, 95%CI)<sup>21</sup>

433 d: excess mortality rates associated with seasonal influenza, USA (median, 95%

434 credibility interval)<sup>22</sup>



435 **Figure 5.** Clinical severity

436 a: symptomatic case-fatality risk (sCFR) associated with COVID-19 in Wuhan, China

437 (mean, 95% CI)

438 b: symptomatic case-fatality risk (sCFR) associated with 1918 pandemic H1N1

439 influenza in August - December 1918, USA (mean)<sup>23</sup>

440 c: symptomatic case-fatality risk (sCFR) associated with 2009 pandemic H1N1

441 influenza, USA (median,95% CI)<sup>25</sup>

442 d: medically attended case-fatality risk (mCFR) associated with COVID-19 in Wuhan,

443 China (mean, 95% CI)

444 e: hospitalization-fatality risk (HFR) associated with COVID-19 in Wuhan, China

445 (mean, 95% CI)

446 f: hospitalization-fatality risk (HFR) associated with 2009 pandemic H1N1 influenza,

447 North America (mean,95% CI)<sup>26</sup>

448 g: symptomatic case-hospitalization risk (sCHR) associated with COVID-19 in

449 Wuhan, China (mean, 95% CI)

450 h: symptomatic case-hospitalization risk (sCHR) associated with 2009 pandemic

451 H1N1 influenza, USA (median,95% CI)<sup>25</sup>

452 i: medically attended case-hospitalization risk (mCHR) associated with COVID-19 in

453 Wuhan, China (mean, 95% CI)

454 **Methods**

455 **Case definitions**

456 Case definitions for laboratory-confirmed-cases were issued by the National Health  
457 Commission of China, and included mild, moderate, severe, and critical cases. Cases  
458 were confirmed by real-time reverse transcription polymerase chain reaction (RT-  
459 PCR) or by viral sequencing indicating genomes highly homologous to SARS-CoV-  
460 2<sup>5, 6, 7, 8</sup>. Clinically-diagnosed cases included suspected cases with pneumonia as  
461 indicated by chest radiography, but without virological confirmation of infection<sup>6</sup>.  
462 The “clinical” definition was only used for one week in Hubei province as laboratory  
463 testing capacity was insufficient, and led to a large number of clinical cases to be  
464 isolated and treated without delay. These clinically-diagnosed cases were included in  
465 our study, recognizing the value of a clinical definition at the peak of a pandemic and  
466 in the context of limited laboratory testing capacity. The laboratory-confirmed cases  
467 include mild-to-critical cases, while the clinically-diagnosed cases include moderate-  
468 to-critical cases. Definitions are presented in detail in Supplementary information file  
469 1.

470

471 **Data source**

472 *COVID-19 cases*

473 Our study aimed to account for underdiagnosis associated with the sensitivity of  
474 laboratory assays, which is strongly dependent on the time lag between symptom

475 onset and diagnostic test<sup>12</sup>. The distribution of lags varied at different phases of the  
476 epidemic in Wuhan due to laboratory testing capacity<sup>4</sup>. Accordingly, the daily number  
477 of COVID-19 cases by symptom onset date was preferred to the aggregated  
478 cumulative data.

479

480 We obtained the following data: The daily number of laboratory-confirmed cases  
481 based on date of symptom onset in Wuhan extracted from a study which included  
482 32,583 laboratory-confirmed COVID-19 cases as of March 8 (*D1*), and 17,365  
483 clinically-diagnosed COVID-19 cases during February 9-19 (*D2*)<sup>4</sup>. The daily number  
484 of laboratory-confirmed cases in Wuhan based on reporting date on March 9-April 3  
485 were extracted from the Hubei Health Commission (*D3*)<sup>3</sup>. The total number of  
486 COVID-19 deaths in Wuhan as of April 24 was obtained from the Hubei Health  
487 Commission (*D4*)<sup>3</sup>. To correct the late reporting, omissions and mis-reporting of  
488 COVID-19 cases due to the healthcare capacity being overwhelmed during the  
489 outbreak, Wuhan Authorities conducted a comprehensive and systematic verification  
490 of reported COVID-19 cases between late March and middle April. A total of 325  
491 laboratory-confirmed cases (*D5*) and 1,290 deaths (*D6*) were added on April 17<sup>3</sup>. The  
492 number of COVID-19 cases stratified by age and clinical category was obtained from  
493 the above sources *data D1* and *D2*, while the age profile of fatal cases was obtained  
494 from the China CDC Weekly report<sup>4, 51</sup>.

495

496 All of these datasets were registered through a surveillance system, which was  
497 launched to record information on COVID-19 cases in China at the start of the  
498 outbreak in late December 2019 in Wuhan<sup>9</sup>. These data were collected from passive  
499 surveillance, and active door-to-door and individual-to-individual screenings for  
500 fever. The active screening was implemented twice in Wuhan on a daily basis from  
501 January 24-February 10, and February 17-19<sup>10, 11</sup>. A total of 16,781 laboratory-  
502 confirmed cases were identified through active screening (*D7*, Details shown in  
503 Supplementary information file 2)<sup>10, 11</sup>.

504

#### 505 *Sensitivity of RT-PCR*

506 A study retrospectively analyzed the RT-PCR assays of 301 patients with 1,113  
507 specimens in Wuhan, and found that RT-PCR sensitivity varied at different phases of  
508 the epidemic due to the difference of interval between symptom onset and laboratory  
509 testing ( $P_{se}$ ) (Supplementary information file 9). The sensitivity of RT-PCR assays  
510 was highest (97.9%) at an interval of <7 days<sup>12</sup>.

511

#### 512 *Health seeking behavior surveys*

513 A population-based telephone and online survey was conducted to understand the  
514 health seeking behaviors of patients suffering from acute respiratory infections (i.e.,  
515 fever with any symptoms of cough, and/or sore throat) during the epidemic of  
516 COVID-19 in Wuhan. Of patients with acute respiratory infections, 35.4% (95% CI

517 28.4%-43.9%) sought medical care, by adjusting for the age structure of Wuhan  
518 population. Children had a higher probability of medical attendance than adults  
519 ( $P_{med.care}$ )<sup>13</sup>.

520

### 521 *Other datasets*

522 A total of 10.7 million persons lived in Wuhan during the epidemic<sup>52</sup>. The age profile  
523 of the Wuhan population was obtained from the China Statistic Yearbook<sup>53</sup>. To  
524 compare the burden of COVID-19 to baseline activity of acute respiratory infections,  
525 we obtained reference historical data on ILI surveillance in Hubei province and SARI  
526 surveillance in Jingzhou city, Hubei province<sup>14, 17, 21</sup>. Additionally, we collected the  
527 annual number of consultations in pediatric and internal medicine departments in  
528 Hubei, and the national number of pneumonia hospitalization rates from the Chinese  
529 Health Statistics Yearbook<sup>54</sup>. All these data were collected from publicly available  
530 sources and did not contain any personal identifiable information. Summary of data  
531 were presented in Supplementary information file 10.

532

### 533 **Statistical analysis**

534 Fig. 1 described the metrics we estimated, data flow, data analysis procedure and  
535 assumptions in the baseline analyses. All analyses were performed in R version  
536 3.6.3<sup>55</sup>.

537

538 *Reported COVID-19 cases in Wuhan*

539 In the baseline analysis, we considered COVID-19 cases in Wuhan as those with  
540 laboratory-confirmation or with a clinical diagnosis (for the brief period where the  
541 clinical definition was in place) and tabulated data by symptom onset date. The  
542 interval between symptom onset and diagnosis was obtained from data  $D1$ <sup>4</sup>. Then, we  
543 randomly simulated 10,000 draws from a gamma distribution representing these time  
544 intervals to estimate onset dates for laboratory-confirmed cases reported between  
545 March 9-April 3 (*data D3*), and added laboratory-confirmed cases (*data D5*). This  
546 allowed us to impute onset dates for cases that did not have this information.

547

548 *Medical consultations*

549 All cases from passive surveillance were considered as medical attendance (data  
550  $D1+D3+D5$ , and  $D2$ ). In the baseline analysis, we assumed that a proportion of mild  
551 cases, and all moderate-to-critical cases captured by active screenings in the  
552 community (data  $D7$ ) would eventually seek medical care given that the health system  
553 was not overwhelmed (*Assumption 1*). The health seeking behavior of mild cases was  
554 assumed to be the same as aforementioned patients with acute respiratory infections  
555 during the COVID-19 epidemic ( $P_{med.care}$ )<sup>13</sup>. Hence, to estimate medically attended  
556 cases, we only excluded a proportion of  $(1-P_{med.care})$  mild cases identified by  
557 community screening from the total reported COVID-19 cases. Moreover, the number

558 of laboratory-confirmed cases from official reports (data  $D1+D3+D5$ , and  $D7$ ) was  
559 divided by the sensitivity of RT-PCR ( $P_{se}$ ) to account for underdiagnoses.

560

#### 561 *Symptomatic cases*

562 In the baseline analysis, we assumed the cases from surveillance system (data  
563  $D1+D3+D5$ , and  $D2$ ) had the same health seeking behavior as those captured by  
564 active screenings in the community (data  $D7$ ) given that the health system was not  
565 overwhelmed (*Assumption 1*). Accordingly, the number of mild symptomatic cases  
566 was estimated by dividing reported mild COVID-19 cases by the probability of  
567 seeking medical care, conditionally on self-reported acute respiratory infection<sup>13</sup>.

568 Adjustment of sensitivity of RT-PCR was considered as well.

569

#### 570 *Hospitalized cases*

571 Moderate-to-critical COVID-19 cases had radiographic evidence of pneumonia, while  
572 mild cases were defined as those without radiographic evidence of pneumonia<sup>5, 6, 7, 8</sup>.

573 Chest x-ray confirmed pneumonia is a threshold for hospital admissions in China.

574 Accordingly, in our study, estimates for SARS-CoV-2 related hospitalizations  
575 excluded patients defined as mild cases in the baseline analysis. (*Assumption 2*)

576

577 In above analyses, to account for the uncertainty of two parameters (RT-PCR  
578 sensitivity and probability of seeking medical care), we conducted a Monte Carlo

579 Simulation by drawing 10,000 samples on the basis of Binomial distributions. We  
580 generated 10,000 estimates for the number of COVID-19 cases, based on which we  
581 calculated the median, and 95% CIs (the 2.5th and 97.5th percentiles) for the  
582 outcomes of interest in this study.

583

584 Additionally, below sensitivity analyses were conducted: in scenario i) for above  
585 *Assumptions 1) and 2)*, we assumed moderate cases had the same health seeking  
586 behavior as mild cases, i.e., only a proportion of moderate cases sought medical  
587 assistance ( $P_{med.care}$ ); and in scenario ii) we excluded clinically-diagnosed cases. Chi-  
588 square tests were used to compare the estimates of baseline and sensitivity analyses.  
589 Two-sided P values  $<0.05$  were considered to indicate statistical significance.

590

591 *Disease burden*

592 We used the number of ILI consultations, and the number of SARI/pneumonia  
593 hospitalizations in the absence of COVID-19 outbreak as a reference to estimate  
594 COVID-19 related ILI medical consultations, and COVID-19 associated  
595 SARI/pneumonia hospitalization rate. Estimation of the number of ILI cases and  
596 SARI/pneumonia hospitalizations during the periods are shown in Supplementary  
597 Information file 11-14.

598



599 Moreover, for comparison with historical outbreaks, we conducted a narrative review  
600 on estimates of disease burden and clinical severity for the 1918 and 2009 influenza  
601 pandemics, as well as seasonal influenza in China and USA (Summary of studies  
602 shown in Supplementary Information file 4-5). The age profile of COVID-19 cases  
603 was obtained from *data DI*<sup>4</sup>, in which COVID-19 cases were broken down into 20-  
604 year age categories. We could not generate disease burden and clinical severity  
605 estimates for influenza using the same age stratification because numerators and  
606 denominators were not available from the literatures.

607

#### 608 **Role of the funding source**

609 The funder of the study had no role in study design, data collection, data analysis, data  
610 interpretation, or writing of the report. The corresponding author had full access to all  
611 the data in the study and had final responsibility for the decision to submit for  
612 publication.

## 613 **References**

- 614 1. Johns Hopkins University. Coronavirus (COVID-19) Information and Updates.  
615 <https://www.coronavirustraining.org/live-map> (accessed July 26 2020).
- 616 2. Centers for Disease Control and Prevention. Past Pandemics.  
617 <https://www.cdc.gov/flu/pandemic-resources/basics/past-pandemics.html> (accessed  
618 May 4 2020).
- 619 3. Health Commission of Hubei Province. Daily report on epidemic situation of COVID-19  
620 in Hubei province. (In Chinese).  
621 <http://wjw.hubei.gov.cn/bmdt/ztzl/fkxxgzbdgrfyyq/xxfb/index.shtml> (accessed July 22  
622 2020).
- 623 4. Pan A., *et al.* Association of Public Health Interventions With the Epidemiology of the  
624 COVID-19 Outbreak in Wuhan, China. *JAMA* **323**, 1915-1923 (2020).
- 625 5. Zhang J., *et al.* Evolving epidemiology and transmission dynamics of novel coronavirus  
626 disease 2019 outside Hubei Province in China: a descriptive and modeling study. *Lancet*  
627 *Infect. Dis.* **20**, 793-802 (2020).
- 628 6. National Health Commission of China. The diagnosis and treatment scheme of novel  
629 coronavirus diseases 2019 (Trial version 5th).  
630 [http://www.gov.cn/zhengce/zhengceku/2020-02/05/content\\_5474791.htm](http://www.gov.cn/zhengce/zhengceku/2020-02/05/content_5474791.htm) (accessed  
631 February 25 2020).
- 632 7. National Health Commission of China. The diagnosis and treatment scheme of novel  
633 coronavirus diseases 2019 (Trial version 6th).  
634 [http://www.gov.cn/zhengce/zhengceku/2020-02/19/content\\_5480948.htm](http://www.gov.cn/zhengce/zhengceku/2020-02/19/content_5480948.htm) (accessed  
635 February 25 2020).
- 636 8. National Health Commission of China. The diagnosis and treatment scheme of novel  
637 coronavirus diseases 2019 (Trial version 7th).  
638 [http://www.gov.cn/zhengce/zhengceku/2020-02/19/content\\_5480948.htm](http://www.gov.cn/zhengce/zhengceku/2020-02/19/content_5480948.htm) (accessed  
639 February 25 2020).
- 640 9. Chinese Center for Disease Control and Prevention. Epidemic update and risk  
641 assessment of 2019 Novel Coronavirus. 2020. (In Chinese).  
642 <http://www.chinacdc.cn/yrdgz/202001/P020200128523354919292.pdf> (accessed  
643 January 31 2020).
- 644 10. The State Council of the People's Republic of China. Announcement of Wuhan  
645 Headquarters for the Control and Treatment of Novel Pneumonia (No. 7) (In Chinese)  
646 [http://www.gov.cn/xinwen/2020-01/24/content\\_5472017.htm](http://www.gov.cn/xinwen/2020-01/24/content_5472017.htm) (accessed January 24  
647 2020).
- 648 11. China Central Television. Report on results of 3-day screening in each district of Wuhan.  
649 (In Chinese).  
650 <http://news.cctv.com/2020/02/20/ARTIfdQ2kV0eRTE4rgX2Aa3D200220.shtml> (accessed  
651 February 20 2020).
- 652 12. Xiao A., Tong Y., Gao C., Zhu L., Zhang Y., Zhang S. Dynamic Profile of RT-PCR Findings  
653 from 301 COVID-19 Patients in Wuhan, China: A Descriptive Study. *J. Clin. Virol.*, 104346

- 654 (2020).
- 655 13. Yang J., *et al.* Health seeking behaviors of patients with acute respiratory infections  
656 during the outbreak of novel coronavirus disease 2019 in Wuhan, China. *medRxiv*,  
657 <https://doi.org/10.1101/2020.1105.1105.20091553> (2020).
- 658 14. Feng L., *et al.* Burden of influenza-associated outpatient influenza-like illness  
659 consultations in China, 2006-2015: A population-based study. *Influenza Other Respir.*  
660 *Viruses* **14**, 162-172 (2020).
- 661 15. Fowlkes A., *et al.* Incidence of medically attended influenza during pandemic and post-  
662 pandemic seasons through the Influenza Incidence Surveillance Project, 2009-13. *Lancet*  
663 *Respir. Med.* **3**, 709-718 (2015).
- 664 16. Shrestha S. S., *et al.* Estimating the burden of 2009 pandemic influenza A (H1N1) in the  
665 United States (April 2009-April 2010). *Clin. Infect. Dis.* **52 Suppl 1**, S75-82 (2011).
- 666 17. Yu H., *et al.* The substantial hospitalization burden of influenza in central China:  
667 surveillance for severe, acute respiratory infection, and influenza viruses, 2010-2012.  
668 *Influenza Other Respir. Viruses* **8**, 53-65 (2014).
- 669 18. Palekar R. S., *et al.* Burden of influenza-associated respiratory hospitalizations in the  
670 Americas, 2010-2015. *PloS One* **14**, e0221479 (2019).
- 671 19. Reed C., *et al.* Estimating influenza disease burden from population-based surveillance  
672 data in the United States. *PloS One* **10**, e0118369 (2015).
- 673 20. Dawood F. S., *et al.* Estimated global mortality associated with the first 12 months of  
674 2009 pandemic influenza A H1N1 virus circulation: a modelling study. *Lancet Infect. Dis.*  
675 **12**, 687-695 (2012).
- 676 21. Li L., *et al.* Influenza-associated excess respiratory mortality in China, 2010-15: a  
677 population-based study. *Lancet Public Health* **4**, e473-e481 (2019).
- 678 22. Iuliano A. D., *et al.* Estimates of global seasonal influenza-associated respiratory  
679 mortality: a modelling study. *Lancet.* **391**, 1285-1300 (2018).
- 680 23. Frost W. H. The Epidemiology of Influenza. *Public Health Rep.* **34**, 1823-1836 (1919).
- 681 24. Mamelund S. E., Haneberg B., Mjaaland S. A Missed Summer Wave of the 1918-1919  
682 Influenza Pandemic: Evidence From Household Surveys in the United States and  
683 Norway. *Open Forum Infect. Dis.* **3**, ofw040 (2016).
- 684 25. Presanis A. M., *et al.* The severity of pandemic H1N1 influenza in the United States, from  
685 April to July 2009: a Bayesian analysis. *PLoS Med.* **6**, e1000207 (2009).
- 686 26. Wong J. Y., *et al.* Hospitalization Fatality Risk of Influenza A(H1N1)pdm09: A Systematic  
687 Review and Meta-Analysis. *Am. J. Epidemiol.* **182**, 294-301 (2015).
- 688 27. Stokes E. K., *et al.* Coronavirus Disease 2019 Case Surveillance - United States, January  
689 22-May 30, 2020. *MMWR* **69**, 759-765 (2020).
- 690 28. Bignami S., Assche A. V. Assessing the burden of COVID-19 in Canada. *medRxiv*,  
691 <https://doi.org/10.1101/2020.1106.1114.20130815> (2020).
- 692 29. Garg S., *et al.* Hospitalization Rates and Characteristics of Patients Hospitalized with  
693 Laboratory-Confirmed Coronavirus Disease 2019 — COVID-NET, 14 States, March 1–30,  
694 2020. *MMWR* **69**, 458–464 (2020).
- 695 30. Lewnard J. A., *et al.* Incidence, clinical outcomes, and transmission dynamics of

- 696 hospitalized 2019 coronavirus disease among 9,596,321 individuals residing in California  
697 and Washington, United States: a prospective cohort study. *BMJ* **369**, m1923 (2020).
- 698 31. WHO-China Joint Mission. Report of the WHO-China Joint Mission on Coronavirus  
699 Disease 2019 (COVID-19). [https://www.chinadaily.com.cn/pdf/2020/who-china-joint-](https://www.chinadaily.com.cn/pdf/2020/who-china-joint-mission-on-covid-19-final-report.pdf)  
700 [mission-on-covid-19-final-report.pdf](https://www.chinadaily.com.cn/pdf/2020/who-china-joint-mission-on-covid-19-final-report.pdf) (accessed March 19 2020).
- 701 32. Zheng L. Analysis and suggestion on the factors leading to the difficulty in the  
702 construction of hierarchical diagnosis system. (In Chinese). *Chinese Health Econ* **38**, 12-  
703 15 (2019).
- 704 33. New York City Department of Health and Mental Hygiene (DOHMH) COVID-19  
705 Response Team. Preliminary Estimate of Excess Mortality During the COVID-19  
706 Outbreak — New York City, March 11–May 2, 2020. *MMWR* **69**, 603–605 (2020).
- 707 34. Weinberger D. M., *et al.* Estimation of Excess Deaths Associated With the COVID-19  
708 Pandemic in the United States, March to May 2020. *JAMA Intern. Med.*, doi:  
709 10.1001/jamainternmed.2020.3391 (2020).
- 710 35. Wu J. T., *et al.* Estimating clinical severity of COVID-19 from the transmission dynamics  
711 in Wuhan, China. *Nat. Med.* **26**, 506–510 (2020).
- 712 36. Tian H., *et al.* An investigation of transmission control measures during the first 50 days  
713 of the COVID-19 epidemic in China. *Science* **368**, 638–642 (2020).
- 714 37. Wang D., *et al.* Clinical Characteristics of 138 Hospitalized Patients With 2019 Novel  
715 Coronavirus-Infected Pneumonia in Wuhan, China. *JAMA* **323**, 1061–1069 (2020).
- 716 38. Zhou F., *et al.* Clinical course and risk factors for mortality of adult inpatients with  
717 COVID-19 in Wuhan, China: a retrospective cohort study. *Lancet.* **395**, 1054–1062  
718 (2020).
- 719 39. Henrik S., *et al.* Estimating the burden of SARS-CoV-2 in France. *Science* **369**, 208–211  
720 (2020).
- 721 40. Yu J., *et al.* Respiratory Syncytial Virus Seasonality, Beijing, China, 2007–2015. *Emerg.*  
722 *Infect. Dis.* **25**, 1127–1135 (2019).
- 723 41. Zhang Z., *et al.* Genetic variability of respiratory syncytial viruses (RSV) prevalent in  
724 Southwestern China from 2006 to 2009: emergence of subgroup B and A RSV as  
725 dominant strains. *J. Clin. Microbiol.* **48**, 1201–1207 (2010).
- 726 42. Sheikhzadeh E., Eissa S., Ismail A., Zourob M. Diagnostic techniques for COVID-19 and  
727 new developments. *Talanta* **220**, 121392 (2020).
- 728 43. Corman V. M., *et al.* Detection of 2019 novel coronavirus (2019-nCoV) by real-time RT-  
729 PCR. *Euro. Surveill.* **25**, (2020).
- 730 44. He J., *et al.* Diagnostic performance between CT and initial real-time RT-PCR for  
731 clinically suspected 2019 coronavirus disease (COVID-19) patients outside Wuhan,  
732 China. *Respir. Med.* **168**, 105980 (2020).
- 733 45. Bordi L., *et al.* Rapid and sensitive detection of SARS-CoV-2 RNA using the Simplexa™  
734 COVID-19 direct assay. *J. Clin. Virol.* **128**, 104416 (2020).
- 735 46. Lai S., *et al.* Effect of non-pharmaceutical interventions to contain COVID-19 in China.  
736 *Nature*, doi: 10.1038/s41586-41020-42293-x (2020).
- 737 47. Leung K., Wu J. T., Liu D., Leung G. M. First-wave COVID-19 transmissibility and severity

- 738 in China outside Hubei after control measures, and second-wave scenario planning: a  
739 modelling impact assessment. *Lancet*. **395**, 1382-1393 (2020).
- 740 48. Chen S., *et al.* Fangcang shelter hospitals: a novel concept for responding to public  
741 health emergencies. *Lancet*. **395**, 1305-1314 (2020).
- 742 49. The State Council of the People's Republic of China. Press Conference of the Joint  
743 Prevention and Control Mechanism of the State Council. (In Chinese).  
744 <http://www.gov.cn/xinwen/gwylflkjz48/index.htm> (accessed March 8 2020).
- 745 50. Li Z., *et al.* Active case finding with case management: the key to tackling the COVID-19  
746 pandemic. *Lancet*. **396**, 63-70 (2020).
- 747 51. The Novel Coronavirus Pneumonia Emergency Response Epidemiology Team. The  
748 Epidemiological Characteristics of an Outbreak of 2019 Novel Coronavirus Diseases  
749 (COVID-19) — China, 2020. *China CDC Weekly* **2**, 113-122 (2020).
- 750 52. Health Commission of Hubei Province. The 20th press conference on prevention and  
751 control of pneumonia caused by novel coronavirus. (In Chinese).  
752 [http://wjw.hubei.gov.cn/fbjd/dtyw/202002/t20200211\\_2023793.shtml](http://wjw.hubei.gov.cn/fbjd/dtyw/202002/t20200211_2023793.shtml) (accessed  
753 February 11 2020).
- 754 53. National Bureau of Statistics. China Statistic Yearbook. <http://www.stats.gov.cn/tjsj/ndsj/>  
755 (accessed March 3 2020).
- 756 54. China Health Commission. Chinese Health Statistical Yearbook. China Peking Union  
757 Medical College Press. (In Chinese).  
758 <http://navi.cnki.net/KNavi/YearbookDetail?pcode=CYFD&pykm=YSIFE&bh=> (accessed  
759 March 11 2020).
- 760 55. The R Project for Statistical Computing. <https://www.r-project.org/> (accessed March 18  
761 2020).
- 762

763 **Acknowledgments**

764 The study was supported by grants from the National Science Fund for Distinguished  
765 Young Scholars (No. 81525023), National Science and Technology Major Project of  
766 China (No. 2018ZX10201001-010, No. 2018ZX10713001-007, No.  
767 2017ZX10103009-005).

768

769 **Author Contributions**

770 H.Y. conceived, designed and supervised the study. J.Y., X.C., X.D., Z.C., H.G.,  
771 H.Y., Q.W., H.S. and S.L. participated in data collection. J.Y., X.C., X.D., Z.C., and  
772 H.G. analyzed the data, and prepared the tables and figures. J.Y. prepared the first  
773 draft of the manuscript. S.L., M.A., C.V. and H.Y. commented on the data and its  
774 interpretation, revised the content critically. All authors contributed to review and  
775 revision and approved the final manuscript as submitted and agree to be accountable  
776 for all aspects of the work.

777

778 **Declaration of interests**

779 H.Y. has received research funding from Sanofi Pasteur, GlaxoSmithKline, Yichang  
780 HEC Changjiang Pharmaceutical Company, and Shanghai Roche Pharmaceutical

781 Company. None of those research funding is related to COVID-19. All other authors  
782 report no competing interests.

783

784 **Additional information**

785 **Supplementary Information** is available for this paper.

786 **Correspondence and requests for materials** should be addressed to J.Y., and H.Y.

a

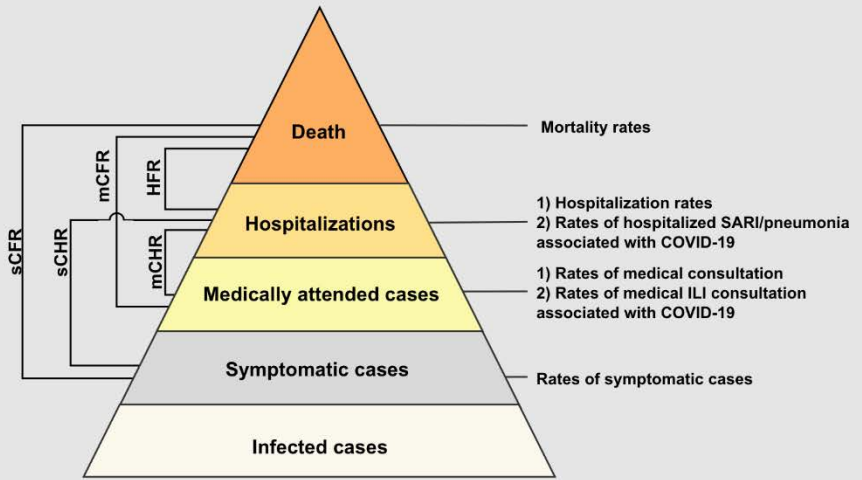

b

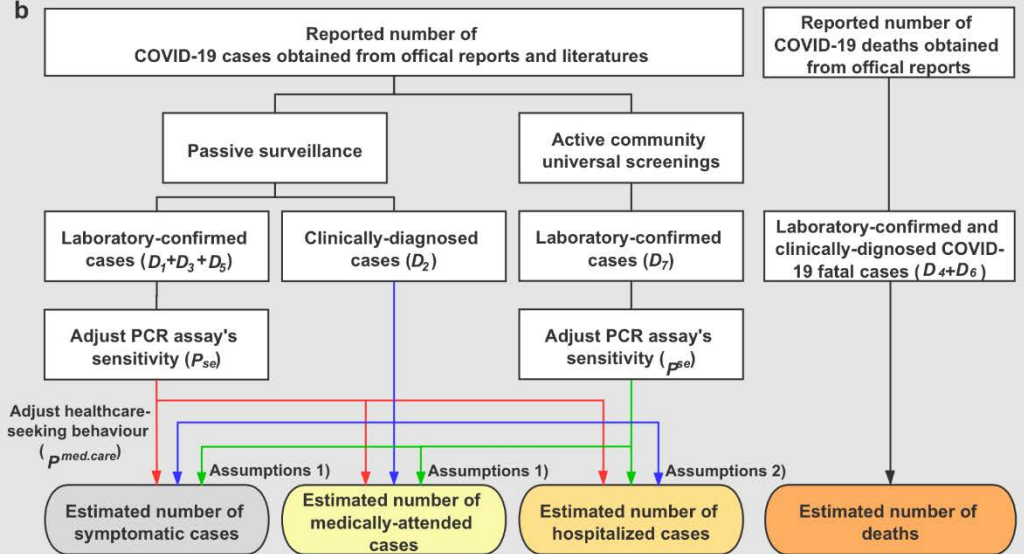

**Assumptions:**

- 1) In the baseline analysis, it was assumed that a proportion of mild cases, and all moderate-to-critical cases captured by universal screenings in the community would eventually seek medical care given that the health system was not overwhelmed. And it was assumed that the cases from surveillance system had the same health seeking behavior as them;
- 2) In the baseline analysis, all moderate/severe/critical COVID-19 cases require hospitalization, while mild cases do not.



**a Wuhan, China**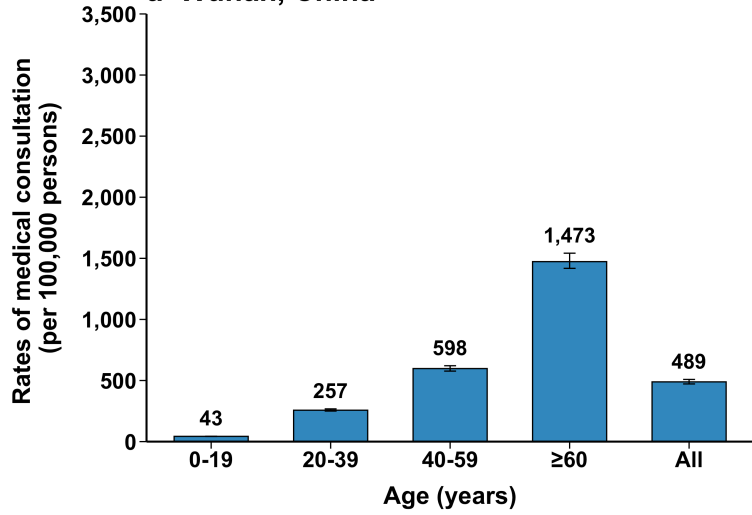**b China**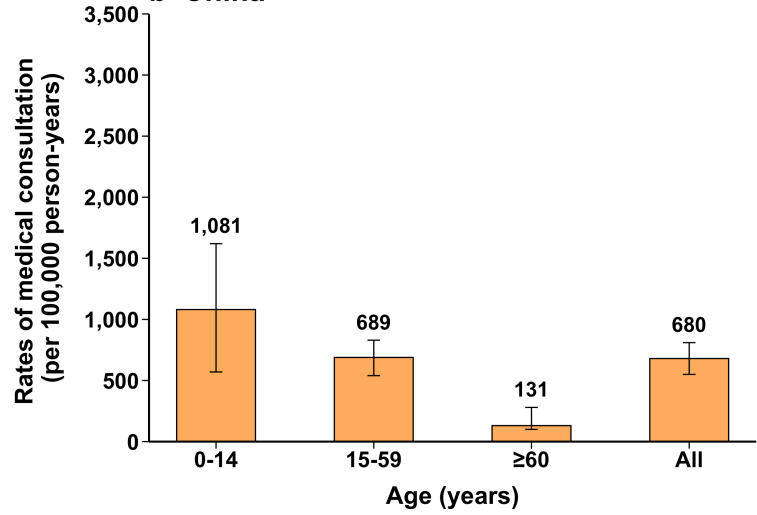**c USA**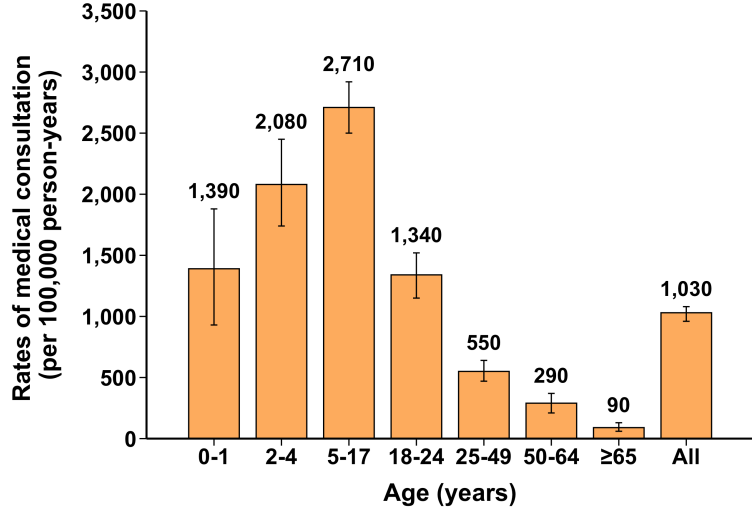**d China**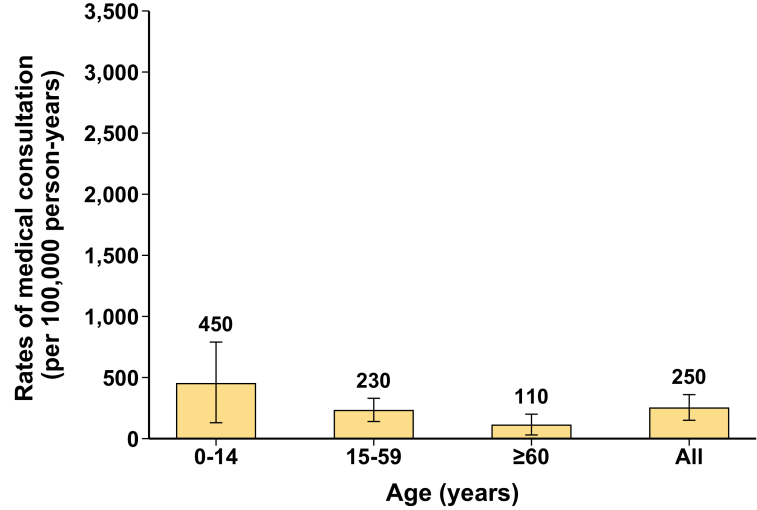**e USA**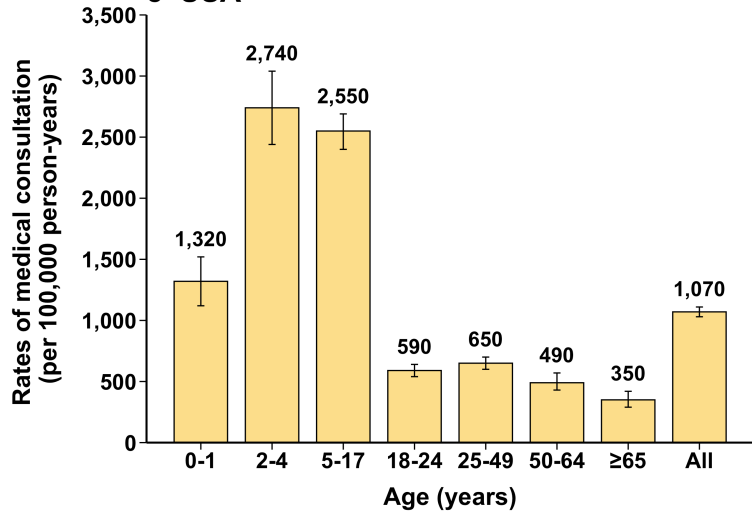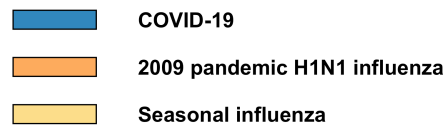

### a Wuhan, China

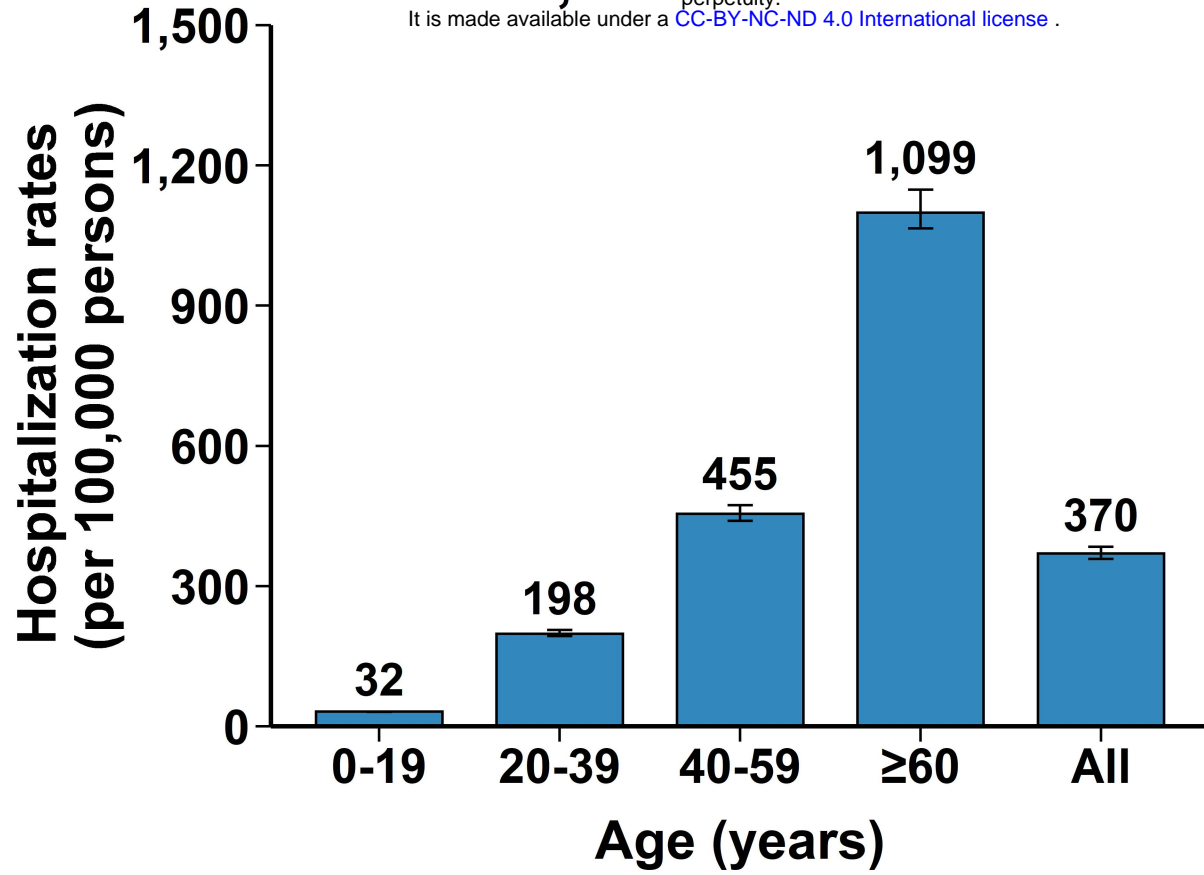

### b USA

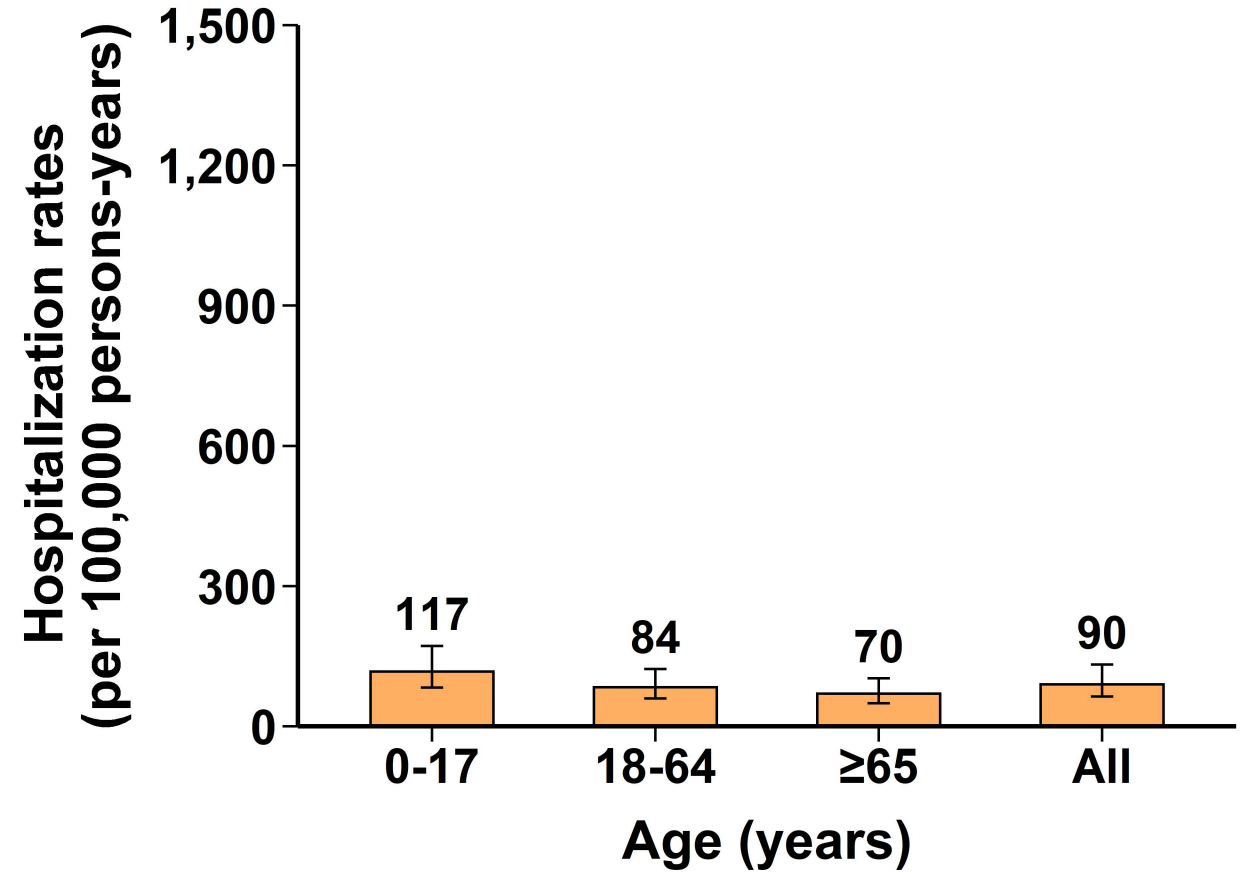

### c Jingzhou, China

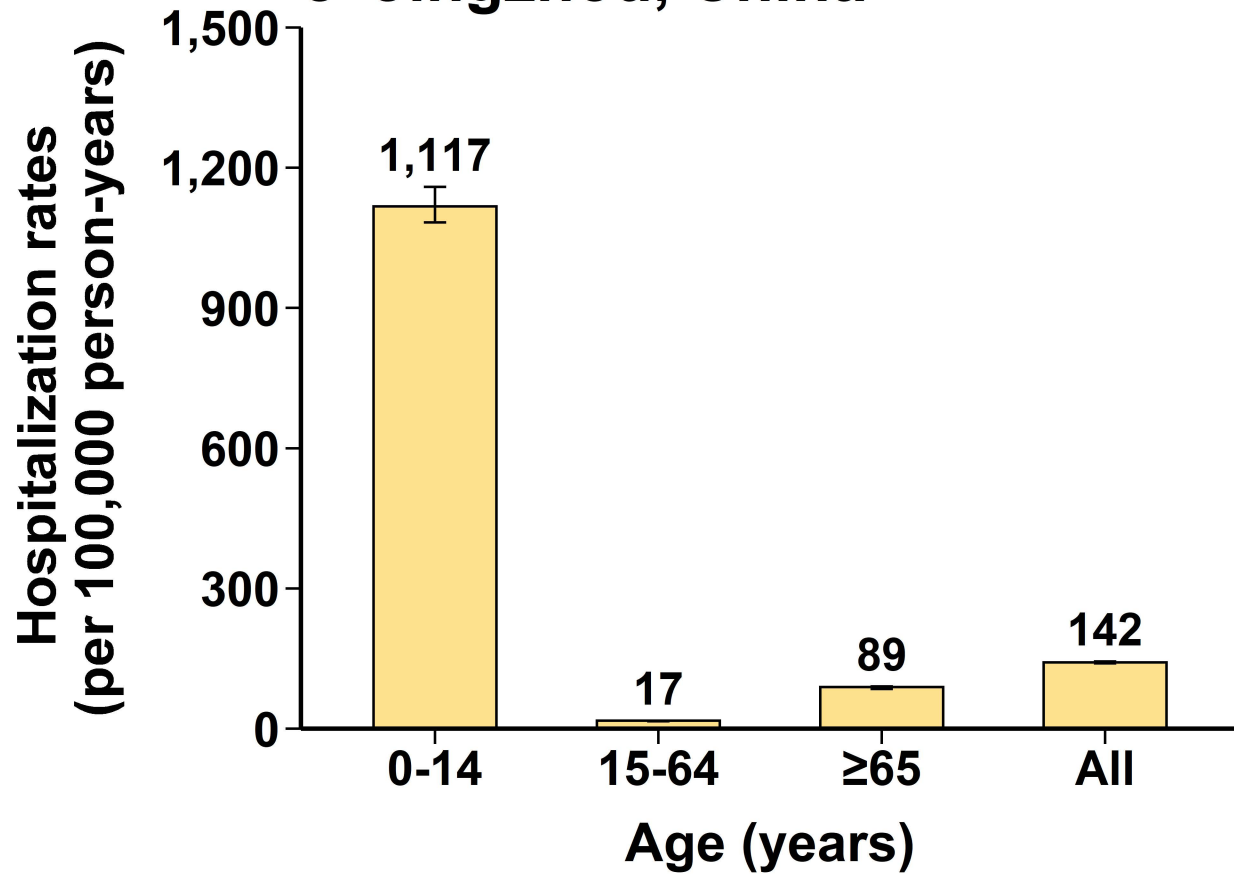

### d USA

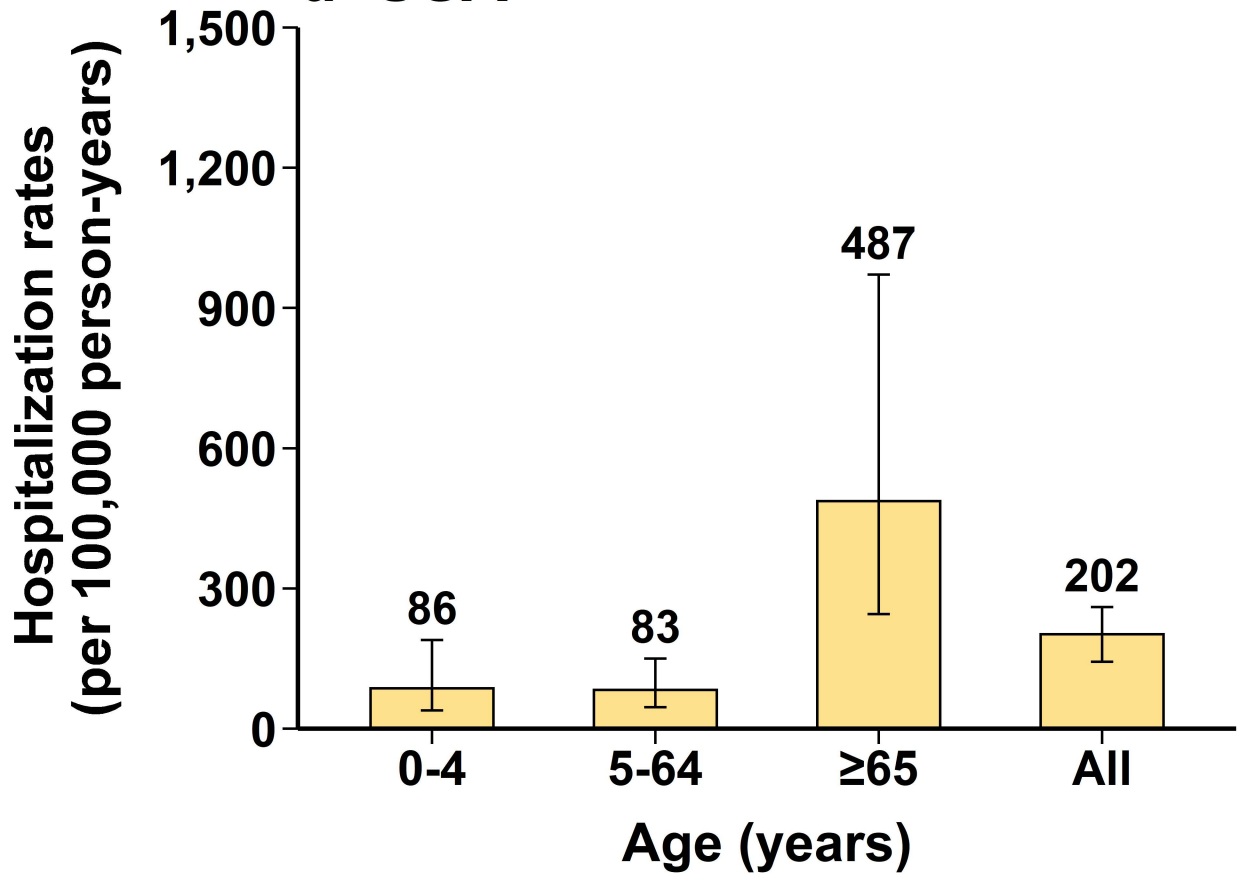

■ COVID-19     
 ■ 2009 pandemic H1N1 influenza     
 ■ Seasonal influenza

### a Wuhan, China

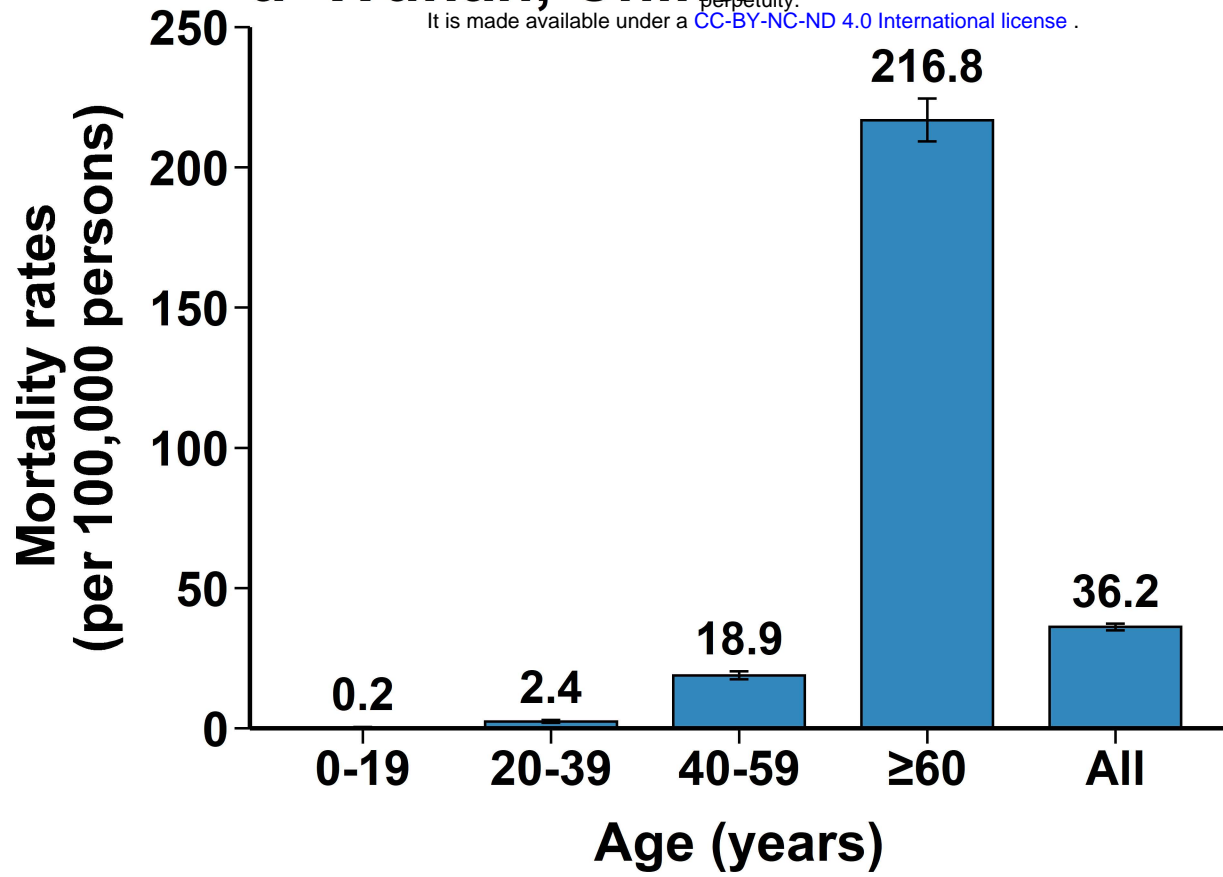

### b USA

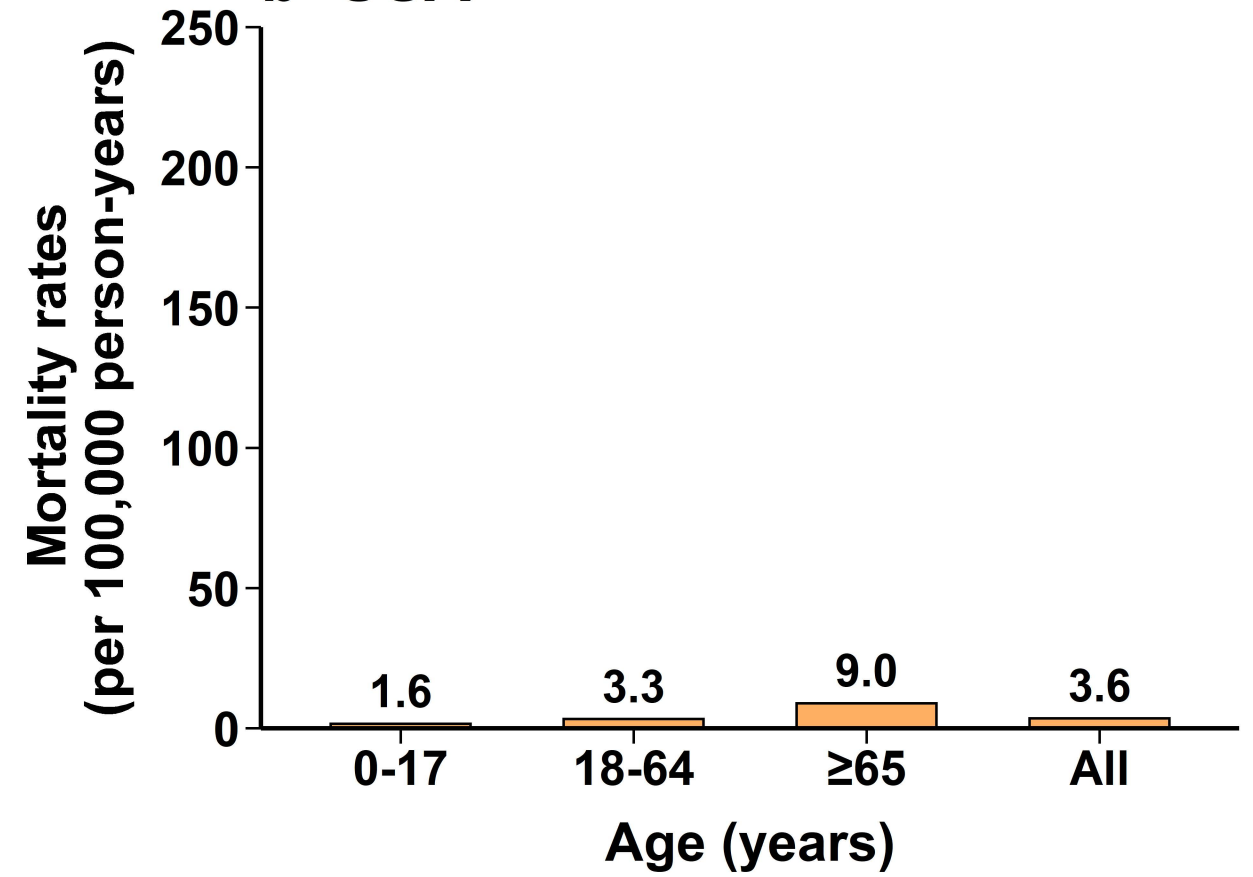

### c China

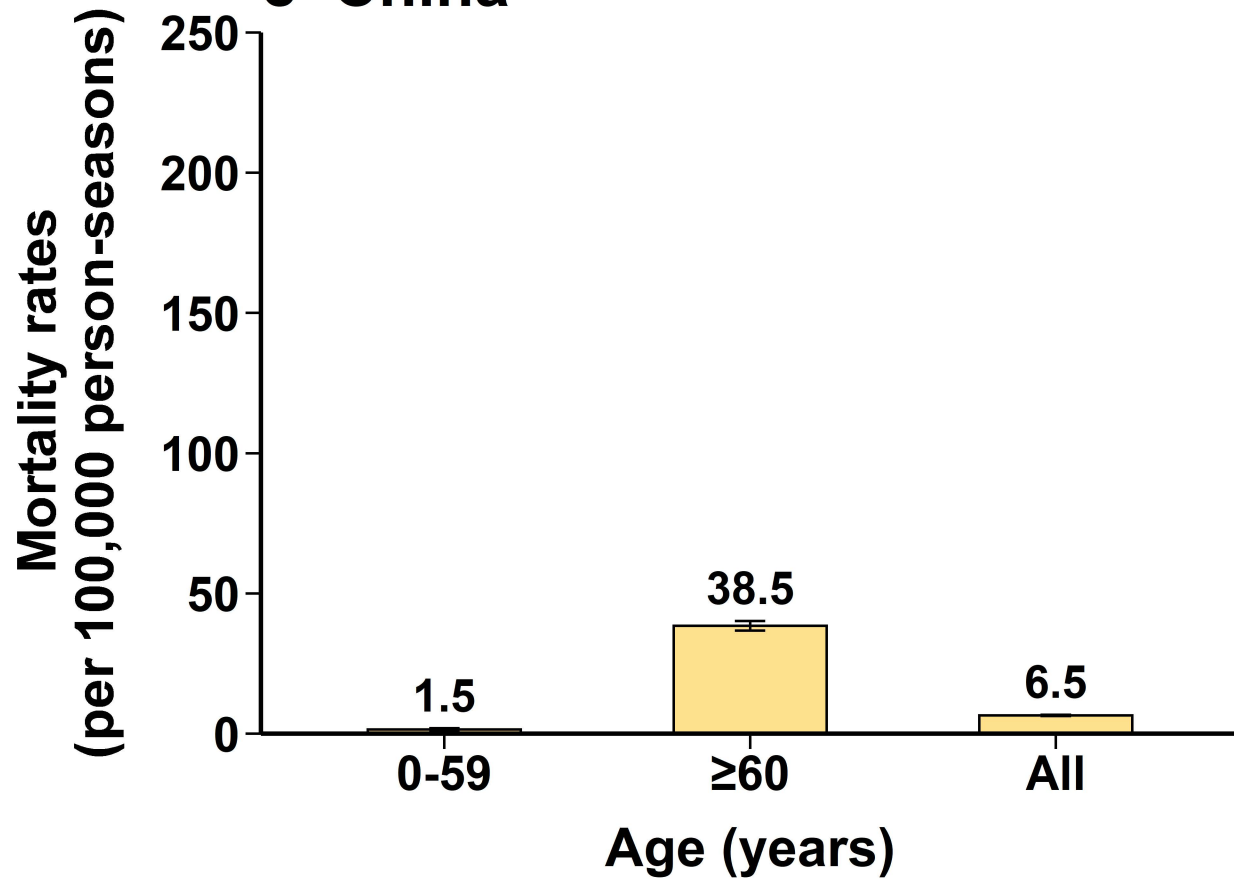

### d USA

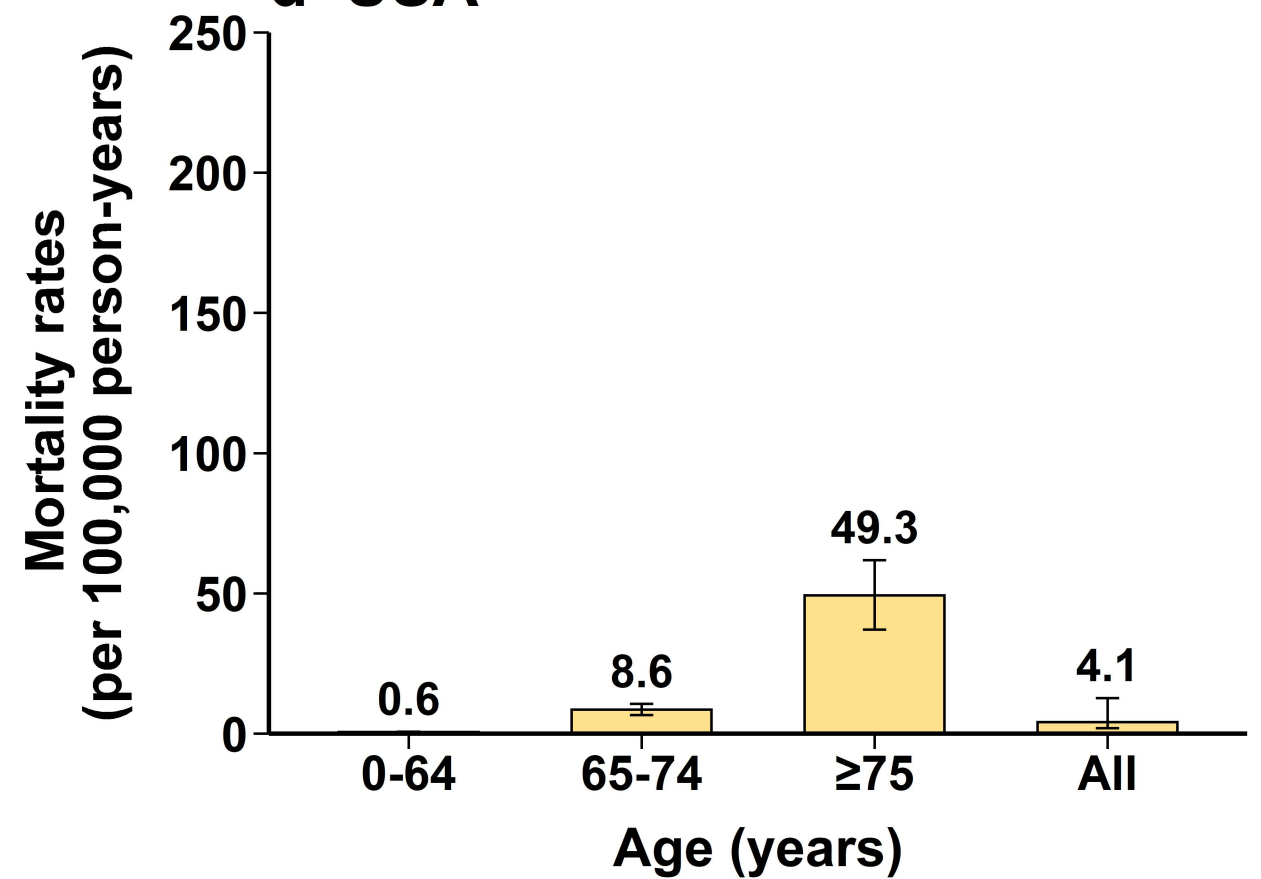

COVID-19      2009 pandemic H1N1 influenza      Seasonal influenza

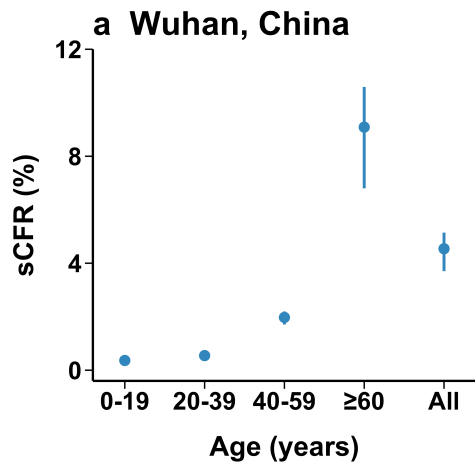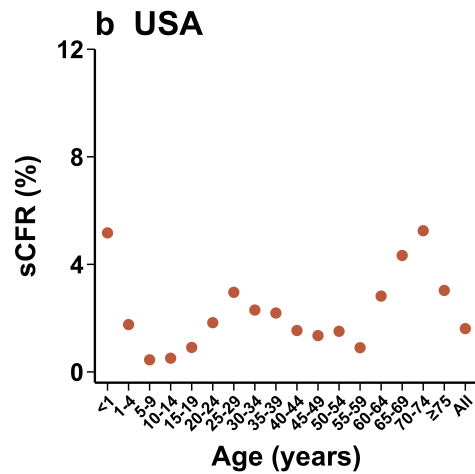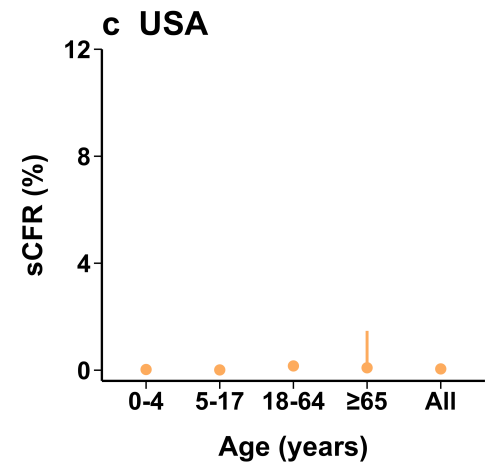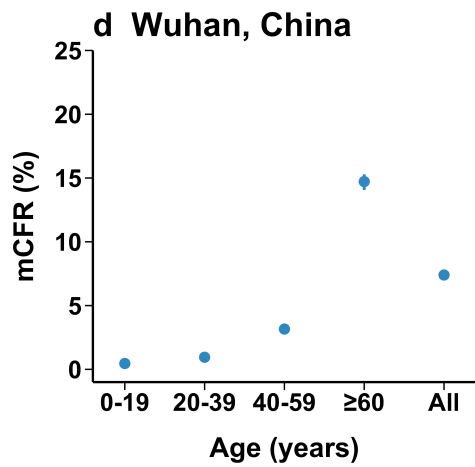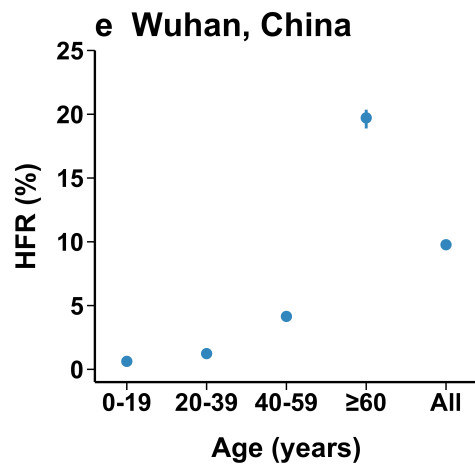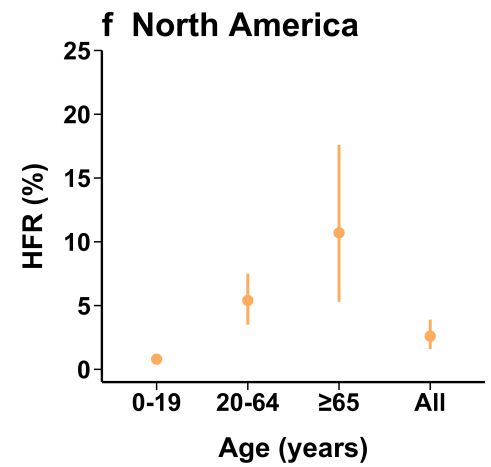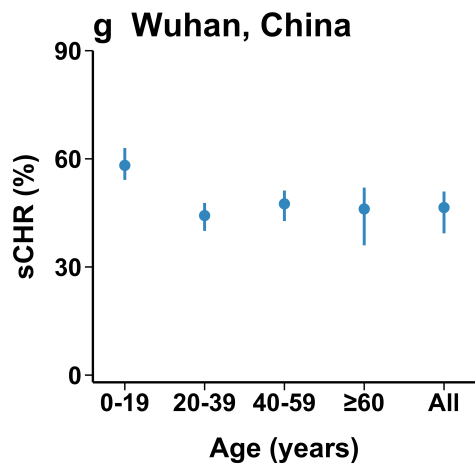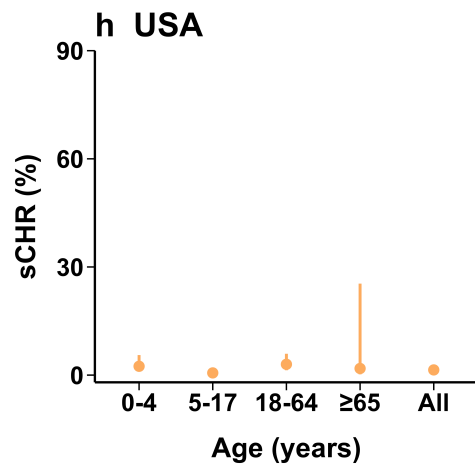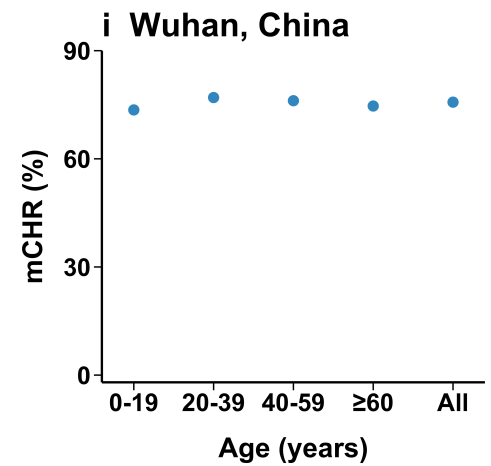

● COVID-19

● 1918 pandemic H1N1 influenza

● 2009 pandemic H1N1 influenza
